# Supplementary material
Source: publisher figshare collection journal article supplement (https://sage.figshare.com/ndownloader/files/24110295)
Supplement: Supplementary file 1 [file 24110295]

Archive with 1 entries (1 files):
- Supplemental Material.pdf
