# Supplementary material
Source: publisher figshare collection journal article supplement (https://sage.figshare.com/ndownloader/files/24110295)
Supplement: Supplementary file 1 [file 24110295 › Supplemental Material.pdf]

# **Journal of Health and Social Behavior**

OFFICIAL JOURNAL OF THE AMERICAN SOCIOLOGICAL ASSOCIATION

**ONLINE SUPPLEMENT**

**to article in**

Journal of Health and Social Behavior, 2020, Vol. 61, Issue 3

**Heterogeneity in Migrant Health Selection: The Role of Immigrant Visas**

**Brittany N. Morey**

*University of California, Irvine*

**Adrian Matias Bacong**

*University of California, Los Angeles*

**Anna K. Hing**

*University of California, Los Angeles*

**A.B. de Castro**

*University of Washington*

**Gilbert C. Gee**

*University of California, Los Angeles*

Supplemental Table A. Poisson Regression of Number of Health Conditions on Visa Processing Time Among Migrants, Health of Philippines Emigrants Study Baseline Sample, Migrants Only ( $n = 831$ )

| Variables                                                                   | Model 1 |          | Model 2 |             | Model 3 |             |
|-----------------------------------------------------------------------------|---------|----------|---------|-------------|---------|-------------|
|                                                                             | $\beta$ | 95% CI   | $\beta$ | 95% CI      | $\beta$ | 95% CI      |
| Visa processing time in years                                               | .02***  | .02, .03 | .01***  | .01, .02    | .01***  | .01, .02    |
| Age                                                                         |         |          | .02***  | .01, .03    | .02***  | .01, .03    |
| Male gender (ref = female)                                                  |         |          | .13*    | .03, .23    | .12*    | .02, .23    |
| Island region (ref = Luzon)                                                 |         |          |         |             |         |             |
| Visayas                                                                     |         |          | -.48*** | -.65, -.31  | -.48*** | -.65, -.32  |
| Mindanao                                                                    |         |          | .01     | -.12, .13   | -.01    | -.13, .11   |
| English proficiency, speaks very well/well (ref = not very well/not at all) |         |          | .17**   | .06, .28    | .08     | -.06, .21   |
| Health care (ref = no treatment)                                            |         |          |         |             |         |             |
| Hospital                                                                    |         |          | .44***  | .32, .56    | .43***  | .31, .55    |
| Clinic or other                                                             |         |          | .44***  | .31, .57    | .40***  | .26, .53    |
| Educational attainment (ref = less than high school)                        |         |          |         |             |         |             |
| High school                                                                 |         |          |         |             | -.24*   | -.45, -.04  |
| Some college                                                                |         |          |         |             | .01     | -.20, .22   |
| College degree and above                                                    |         |          |         |             | .08     | -.12, .28   |
| Financial strain (ref = high)                                               |         |          |         |             |         |             |
| Medium                                                                      |         |          |         |             | -.04    | -.16, .09   |
| Low                                                                         |         |          |         |             | .03     | -.12, .18   |
| Constant                                                                    | .16***  | .08, .24 | -.81*** | -1.08, -.54 | -.71*** | -1.06, -.37 |

*Note.* CI = confidence interval; ref = reference category. Visa processing time is an estimate of the number of years between the final visa paperwork being filed by the applicant and when the visa is issued to allow the person to migrate to the United States.

\*\*\* $p < .001$ , \*\* $p < .01$ , \* $p < .05$ , + $p < .10$
